# Supplementary material
Source: Springer Nature journal article supplement (https://www.springermedizin.de/resource/supplementary/12881_2012_1128_MOESM1_ESM.pdf/9452022)

**A**

|               |      |                                                     |      |
|---------------|------|-----------------------------------------------------|------|
| H. sapiens    | 426  | AEGLPRMNTSLMANVKKAFIGENKDLVDPYVQVFFAGQKGKTSVQKSSYE  | 475  |
| C. lupus      | 426  | AEGLPRMNTSLMANVKKAFIGENKDLVDPYVQVFFAGQKGKTSVQKSSYE  | 475  |
| B. taurus     | 426  | AEGLPRMNTSLMANVKKAFIGENKDLVDPYVQVFFAGQKGKTSVQKSSYE  | 475  |
| M. musculus   | 425  | AEGLPRMNTSLMANVKKAFIGENKDLVDPYVQVFFAGQKGKTSVQKSSYE  | 474  |
| R. norvegicus | 441  | AEGLPRMNTSLMANVKKAFIGENKDLVDPYVQVFFAGQKGKTSVQKSSYE  | 490  |
| G. gallus     | 436  | AEGLPRMNTSIMANVKKALIGENKDLVDPYVQVAFAGQKGKTSVQKSSYE  | 485  |
| D. rerio      | 431  | AEGLPKMNTSIMANVKKAFIGENRDLVDPYVLLVQFAGQKGKTSVQKSSYE | 480  |
|               |      |                                                     |      |
| H. sapiens    | 1555 | SMLTVAVYDWDLVGTDDLIGETKIDLENRFYSKHRATCGIAQTYSTHGYN  | 1604 |
| C. lupus      | 1555 | SMLTVAVYDWDLVGTDDLIGETKIDLENRFYSKHRATCGIAQTYSIHGYN  | 1604 |
| B. taurus     | 1556 | SMLTVAVYDWDLVGTDDLIGETKIDLENRFYSKHRATCGIAQTYSVHGYN  | 1605 |
| M. musculus   | 1555 | SMLTVAVYDWDLVGTDDLIGETKIDLENRFYSKHRATCGIAQTYSIHGYN  | 1604 |
| R. norvegicus | 1551 | SMLTVAVYDWDLVGTDDLIGETKIDLENRFYSKHRATCGIAQTYSIHGYN  | 1600 |
| G. gallus     | 1568 | SMLTVAVYDWDLVGTDDLIGETKIDLENRYYSKHRATCGVSVQTSYIHGYN | 1617 |
| D. rerio      | 1550 | SMLTVAVYDWDLVGTDDLIGETKIDLENRYYSKHRATCGIASVSVHGYN   | 1599 |
|               |      |                                                     |      |
| H. sapiens    | 1755 | EKSSDIFVRGWLKGQQEDKQDTDVHYHSLTGEENFNWRYLFPFDYLAEEE  | 1804 |
| C. lupus      | 1755 | EKSSDIFVRGWLKGQQEDKQDTDVHYHSLTGEENFNWRYLFPFDYLAEEE  | 1804 |
| B. taurus     | 1756 | EKSSDIFVRGWLKGQQEDKQDTDVHYHSLTGEENFNWRYLFPFDYLAEEE  | 1805 |
| M. musculus   | 1755 | EKSSDIFVRGWLKGQQEDKQDTDVHYHSLTGEENFNWRYLFPFDYLAEEE  | 1804 |
| R. norvegicus | 1751 | EKSSDIFVRGWLKGQQEDKQDTDVHYHSLTGEENFNWRYLFPFDYLAEEE  | 1800 |
| G. gallus     | 1768 | EKSSDIFVRGWLKGQQEDKQDTDVHYHSLTGEENFNWRYIFPFDYLMEEE  | 1817 |
| D. rerio      | 1750 | EKSSDIFVRGWLKGQQEDKQDTDVHYHSLTGEENFNWRFVFPFDYLMEEE  | 1799 |

**B**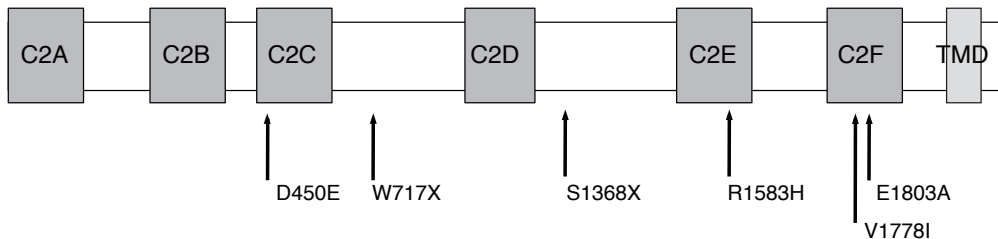

Supplement: MOESM1 [file 9452022]
